# Supplementary material for: Electrochemical redox mechanism of Co–B–H anode material and its optimization by a novel electrolyte additive
Source: Royal Society of Chemistry journal article supplement (doi:10.1039/c2ra22652a), 2012-11-26
Supplement: c2ra22652a.pdf [file c2ra22652a.pdf]

## Electronic Supplementary information (ESI)

### Electrochemical redox mechanism of Co-B-H anode material and its optimization by a novel electrolyte additive

Xiangyu Zhao, Jiajia Li, Yan Yao, Liqun Ma, Xiaodong Shen

*State Key Laboratory of Materials-Oriented Chemical Engineering, College of Materials  
Science and Engineering, Nanjing University of Technology, 5 Ximofan Road, Nanjing  
210009, PR China*

Table S1. ICP-AES results of as-prepared Co-B-H samples

| KBH <sub>4</sub> | Co (at.%) | B (at.%) |
|------------------|-----------|----------|
| 0.5 M            | 70.1      | 29.9     |
| 1.0 M            | 66.8      | 33.2     |
| 2.0 M            | 49.8      | 50.2     |

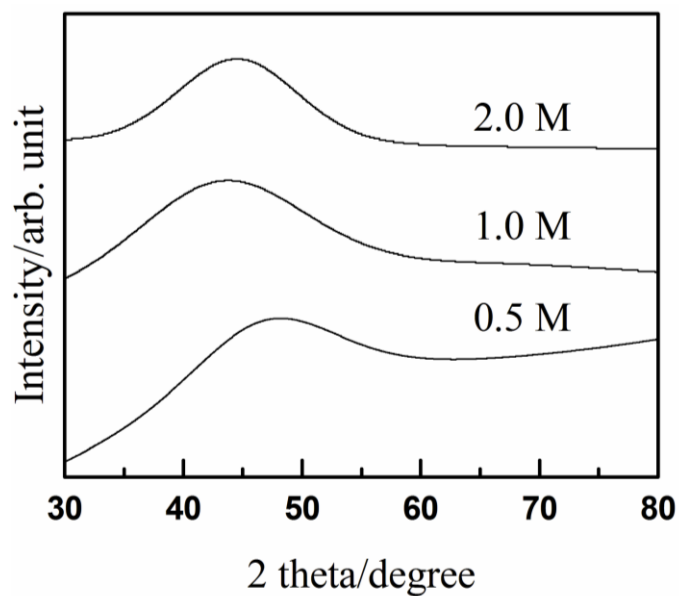

Fig. S1 XRD patterns of the as-prepared Co-B-H samples.

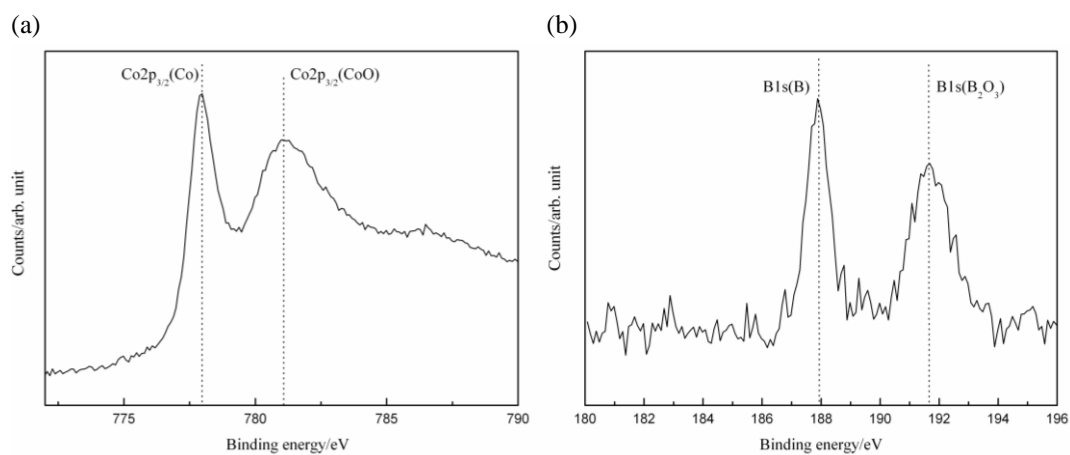

Fig. S2 XPS region spectra of (a) Co 2p and (b) B 1s for an amorphous Co-B-H sample.

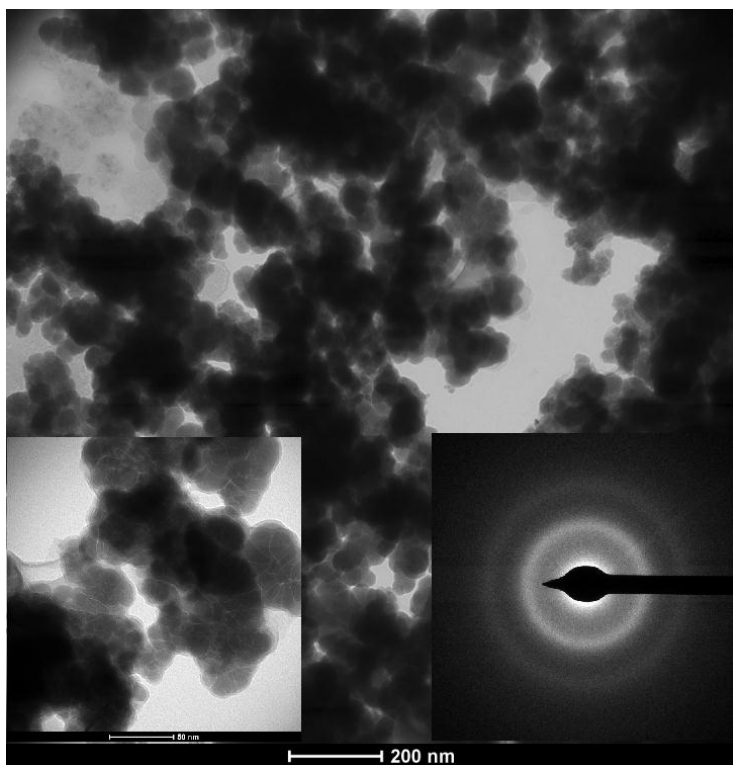

Fig. S3 TEM images of the  $\text{Co}_{2.012}\text{BH}_y$  sample.
